# Supplementary material for: Modulation of ICT and PET processes in boranil derivatives: a ratiometric fluorescent probe for imaging of cysteine
Source: Royal Society of Chemistry journal article supplement (doi:10.1039/c9ay00235a), 2019-01-01

**Supplementary Data For**

Modulation of ICT and PET processes in Boranil derivatives:  
ratiometric fluorescent probe for imaging of cysteine

**Dongjian Zhu,\* Xiaowei Yan, Aishan Ren,\* Wen Cai, Zhenhua Duan and Yanghe Luo**

Institute of Food Science & Engineering Technology, College of Food and Bioengineering,  
Hezhou University, Hezhou 542899, P. R. China, E-mail: zhudongjian@iccas.ac.cn (D. Zhu),  
rash\_yudi@163.com (A. Ren).

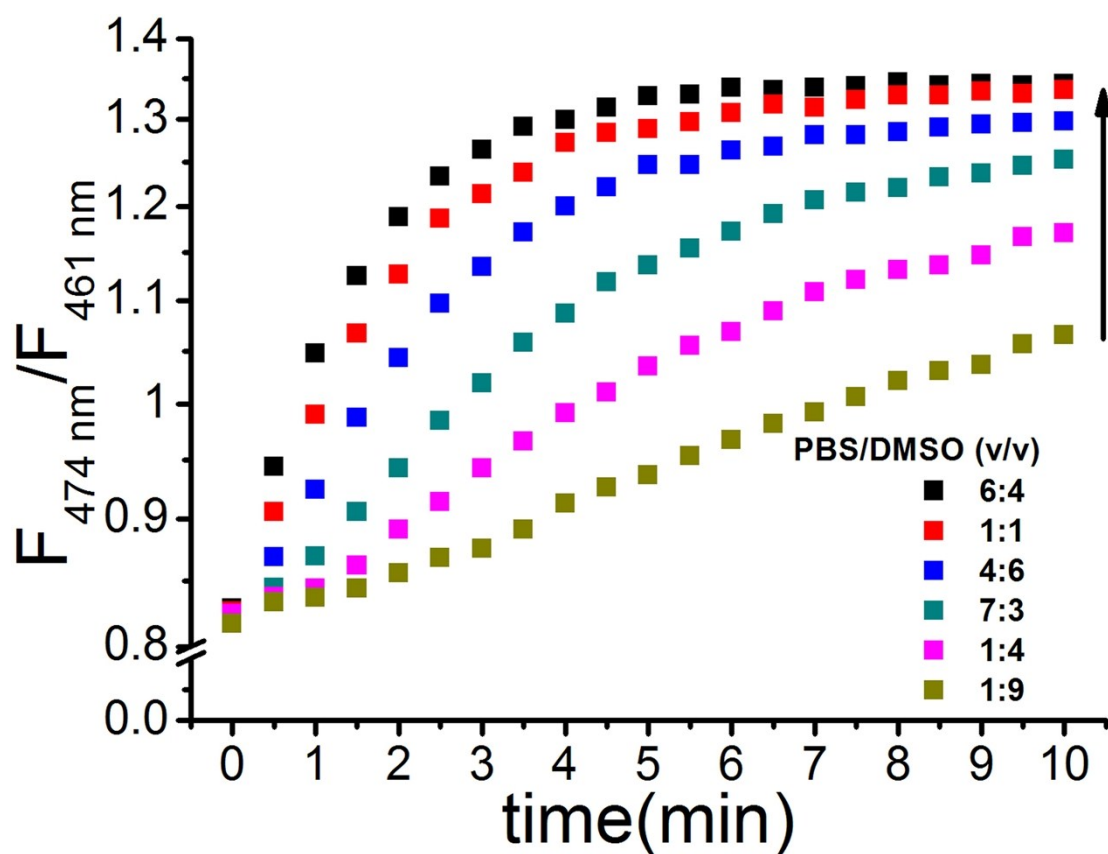

**Fig. S1** Plot of fluorescence intensity ratio of  $F_{474 \text{ nm}}/F_{461 \text{ nm}}$  versus the reaction time in the presence of Cys in PBS buffer solution (10 mM, pH 7.4, 25 °C) with different ratios of DMSO and PBS buffer solution.

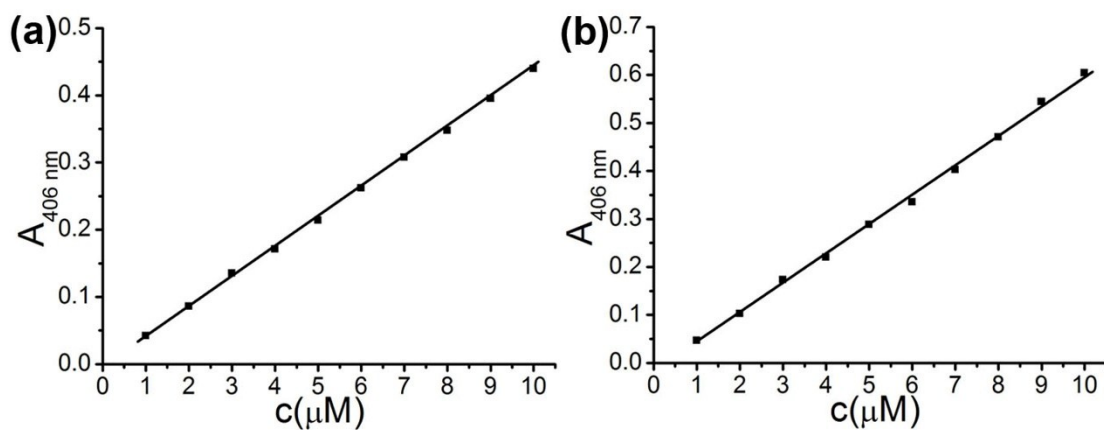

**Fig. S2** (a) Plot of absorbance at 406 nm against **1** concentration in PBS buffer solution (10 mM, H<sub>2</sub>O/DMSO, 1:1, v/v, pH 7.4, 25 °C). (b) Plot of absorbance at 406 nm against **2** concentration in PBS buffer solution (10 mM, H<sub>2</sub>O/DMSO, 1:1, v/v, pH 7.4, 25 °C)

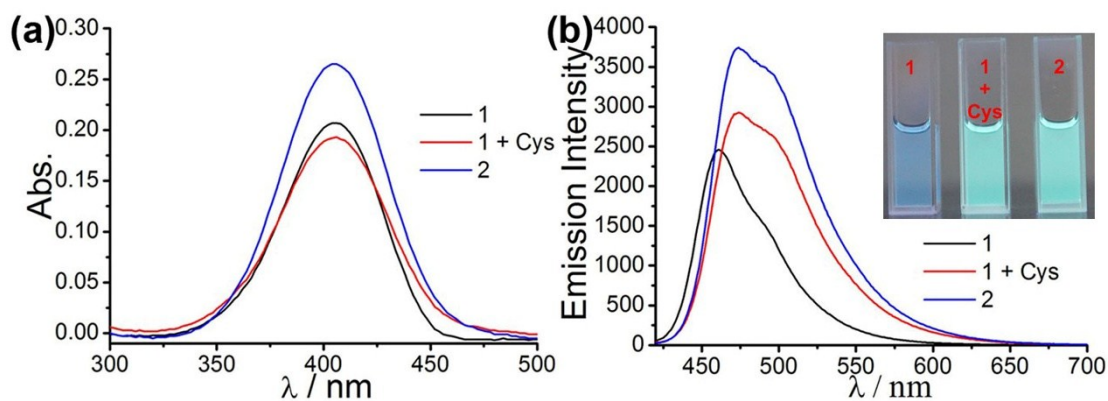

**Fig. S3** (a) Absorption spectra of **2** (5  $\mu$ M) (blue line), **1** (5  $\mu$ M) (black line) before and after reaction with Cys (20  $\mu$ M) (red line) in PBS buffer solution (10 mM, H<sub>2</sub>O/DMSO, 1:1, v/v, pH 7.4, 25  $^{\circ}$ C). (b) Fluorescence spectra of **2** (5  $\mu$ M) (blue line), **1** (5  $\mu$ M) (black line) before and after reaction with Cys (20  $\mu$ M) (red line) in PBS buffer solution (10 mM, H<sub>2</sub>O/DMSO, 1:1, v/v, pH 7.4, 25  $^{\circ}$ C,  $\lambda_{\text{ex}}$  = 405 nm). The fluorescence color changes of **1** before and after the reaction and **2** in PBS buffer solution under illumination with a 365 nm UV lamp are shown in the inset.

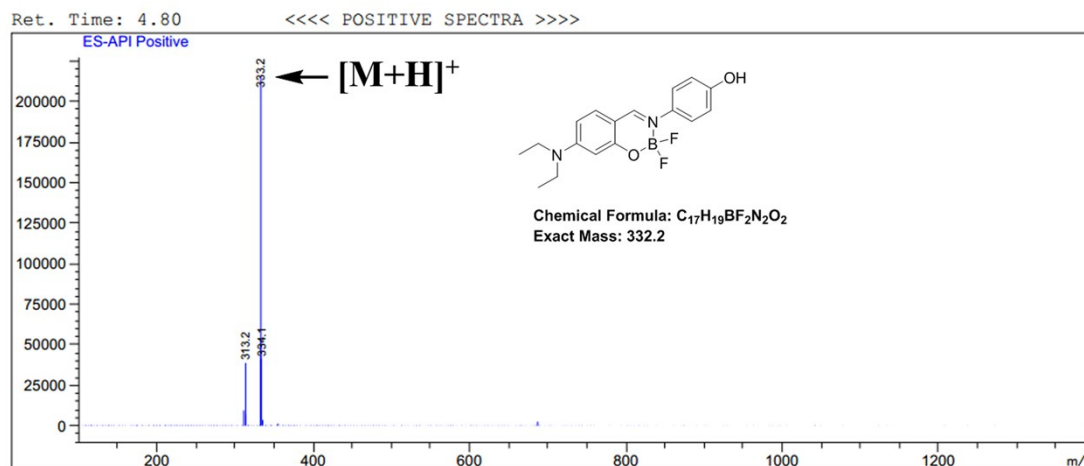

**Fig. S4** ESI-MS spectrum of **1** after addition of Cys in PBS buffer solution (10 mM, H<sub>2</sub>O/DMSO, 1:1, v/v, pH 7.4, 25  $^{\circ}$ C).

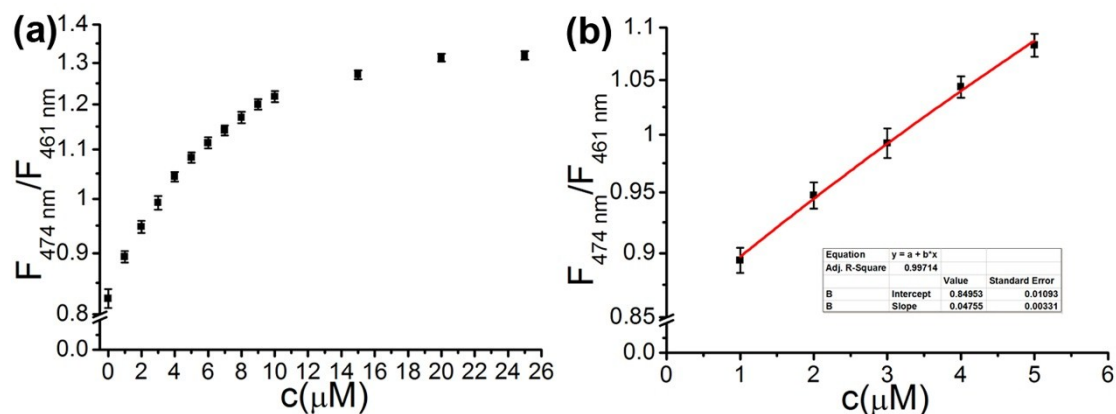

**Fig. S5** (a) The ratios of fluorescence intensities ( $F_{474 \text{ nm}}/F_{461 \text{ nm}}$ ) of **1** (5  $\mu\text{M}$ ) with varied concentrations of Cys in PBS buffer solution (10 mM,  $\text{H}_2\text{O}/\text{DMSO}$ , 1:1, v/v, pH 7.4, 25  $^\circ\text{C}$ ,  $\lambda_{\text{ex}} = 405 \text{ nm}$ ). (b) The ratios of fluorescence intensities ( $F_{474 \text{ nm}}/F_{461 \text{ nm}}$ ) of **1** as a function of the concentrations of Cys in the range of 1 - 5  $\mu\text{M}$  upon excitation at 405 nm and the calculation of the detection limit of probe **1** for Cys.

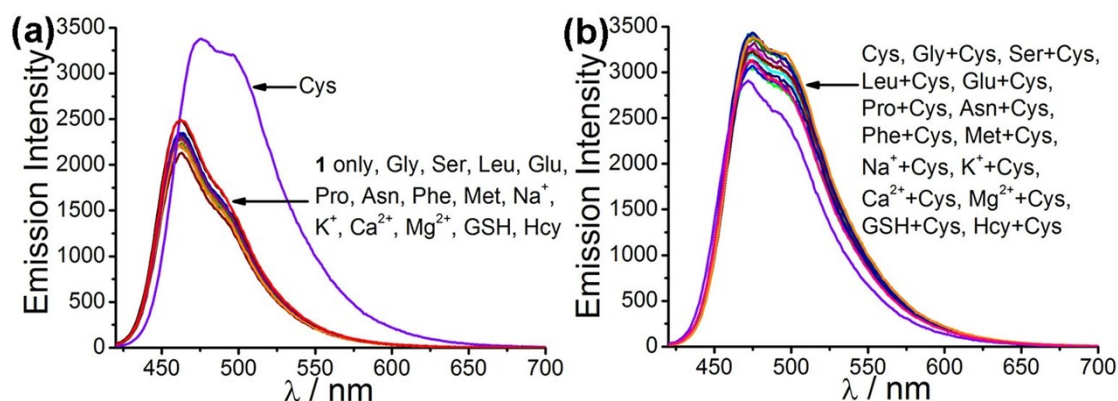

**Fig. S6** Fluorescence spectra of **1** (5  $\mu\text{M}$ ) after addition of various analytes: **1** (none), Gly (100  $\mu\text{M}$ ), Ser (100  $\mu\text{M}$ ), Leu (100  $\mu\text{M}$ ), Glu (100  $\mu\text{M}$ ), Pro (100  $\mu\text{M}$ ), Asn (100  $\mu\text{M}$ ), Phe (100  $\mu\text{M}$ ), Met (100  $\mu\text{M}$ ), NaCl (1 mM), KCl (1 mM),  $\text{CaCl}_2$  (1 mM),  $\text{MgCl}_2$  (1 mM), Cys (20  $\mu\text{M}$ ), GSH (20  $\mu\text{M}$ ), Hcy (20  $\mu\text{M}$ ). (a): free probe and probe treated with the marked analytes. (b): probe treated with Cys in the presence of the marked analytes. Data were acquired in PBS buffer solution (10 mM,  $\text{H}_2\text{O}/\text{DMSO}$ , 1:1, v/v, pH 7.4, 25  $^\circ\text{C}$ ,  $\lambda_{\text{ex}} = 405 \text{ nm}$ ).

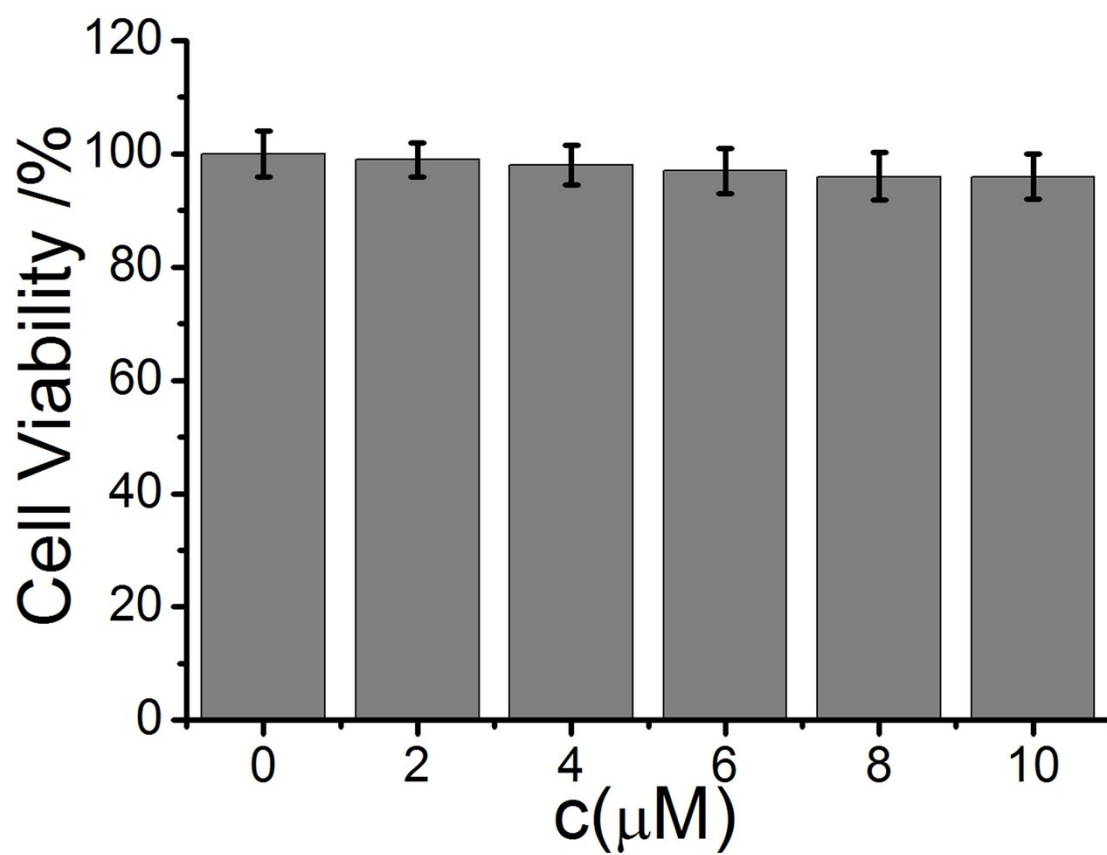

**Fig. S7** CCK-8 assay of HeLa cells in the presence of various concentrations of **1** (0, 2, 4, 6, 8, 10 μM) for 24 h at 37 °C.

# NMR Spectra

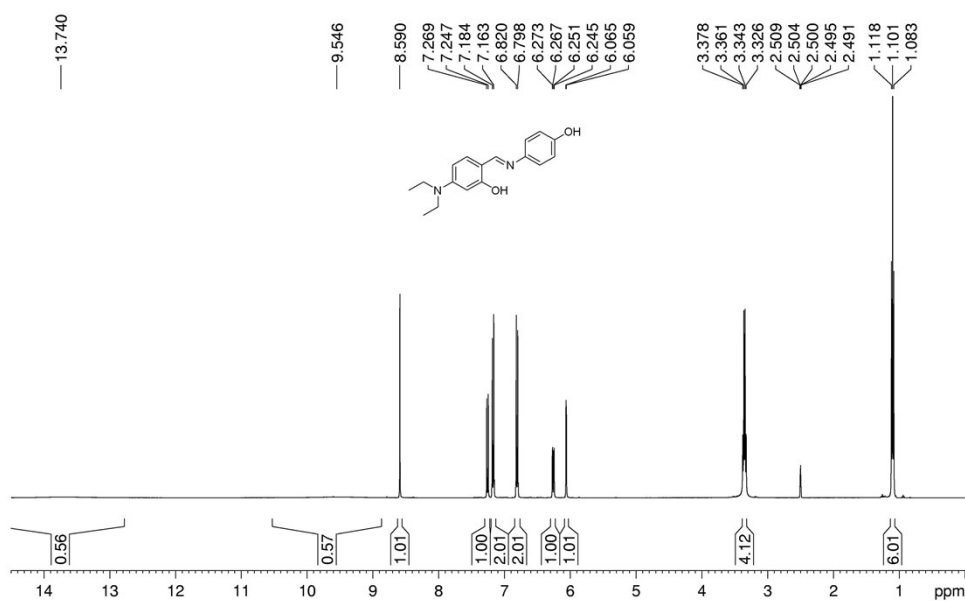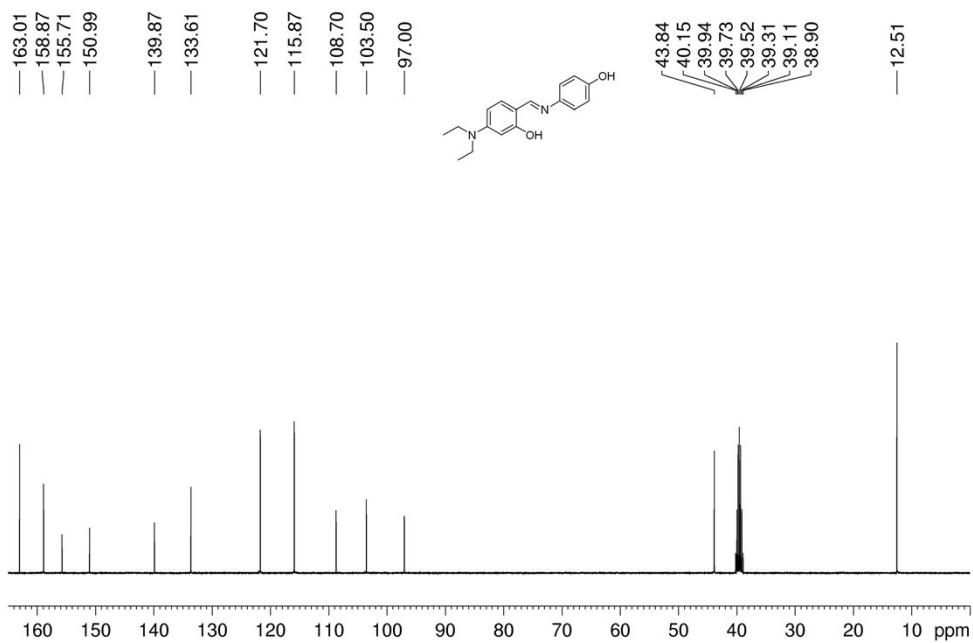

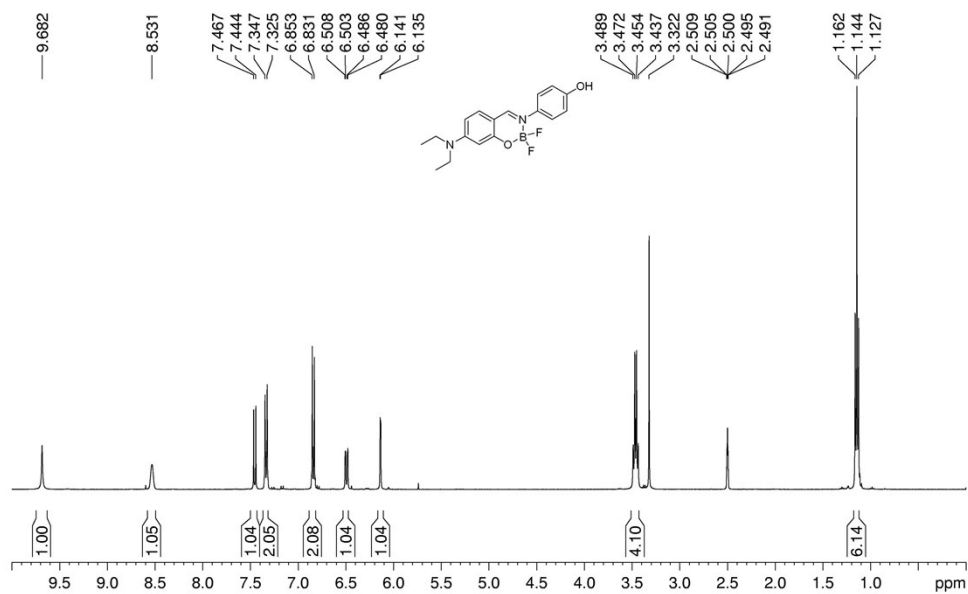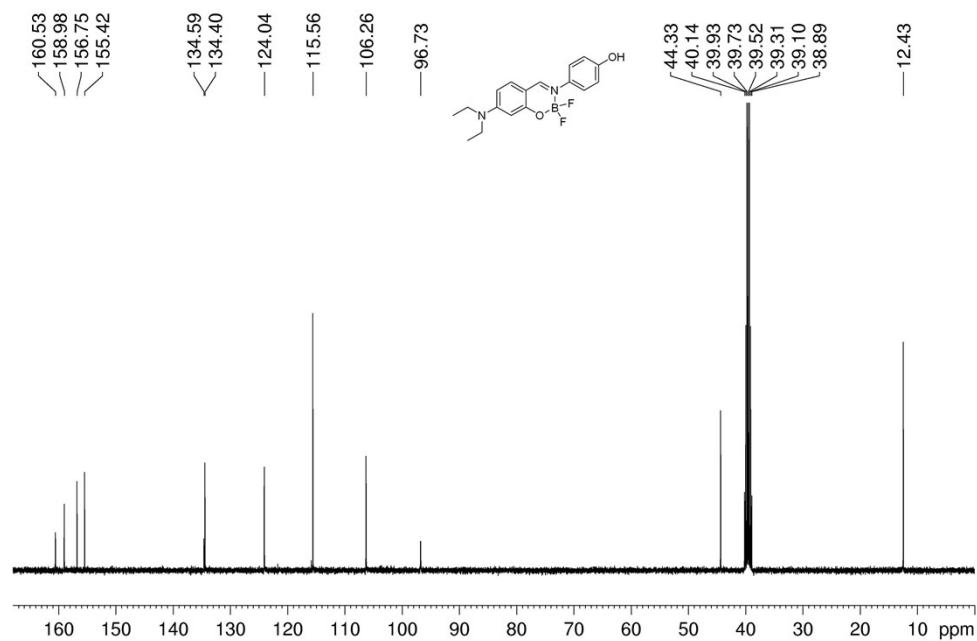

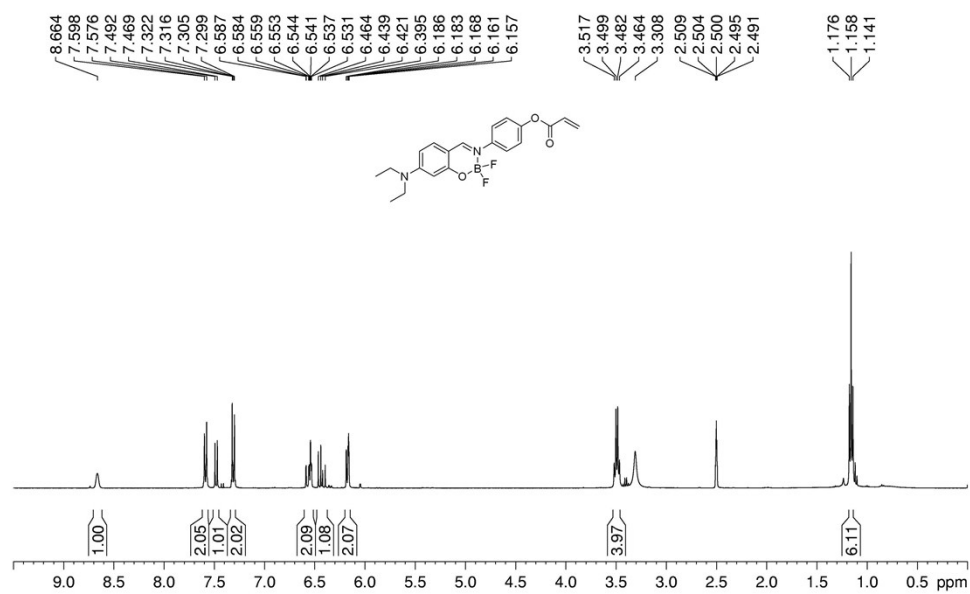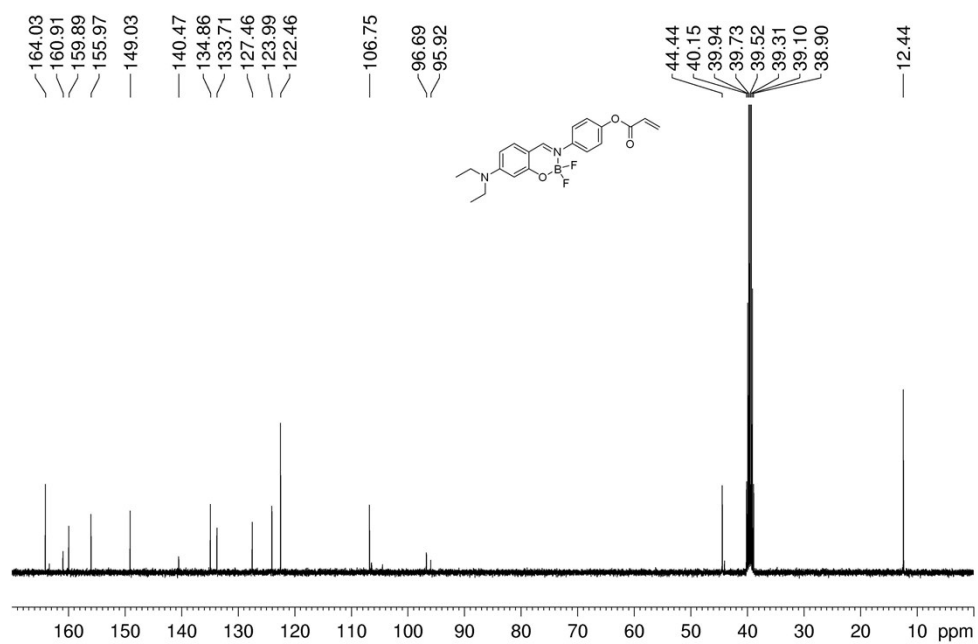

## ESI-MS Spectra

Ret. Time: 3.71

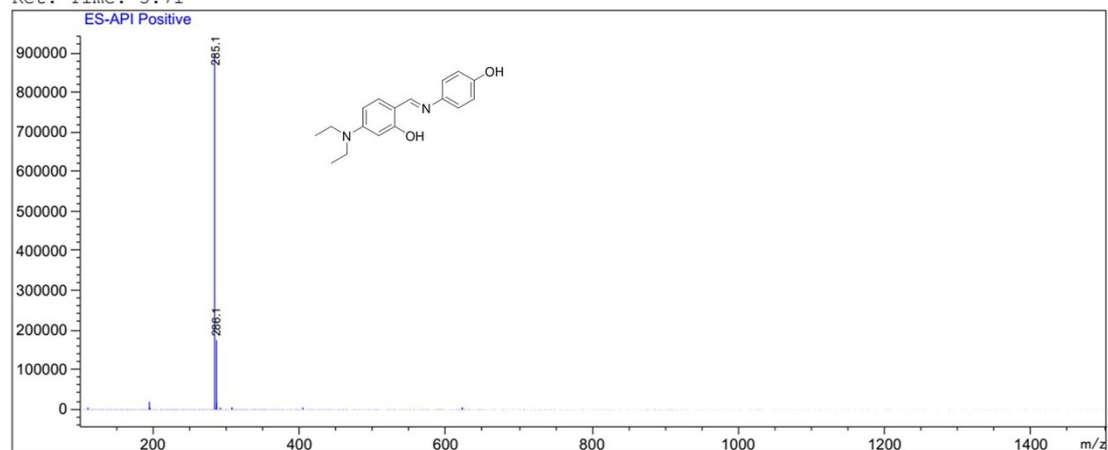

Ret. Time: 5.00

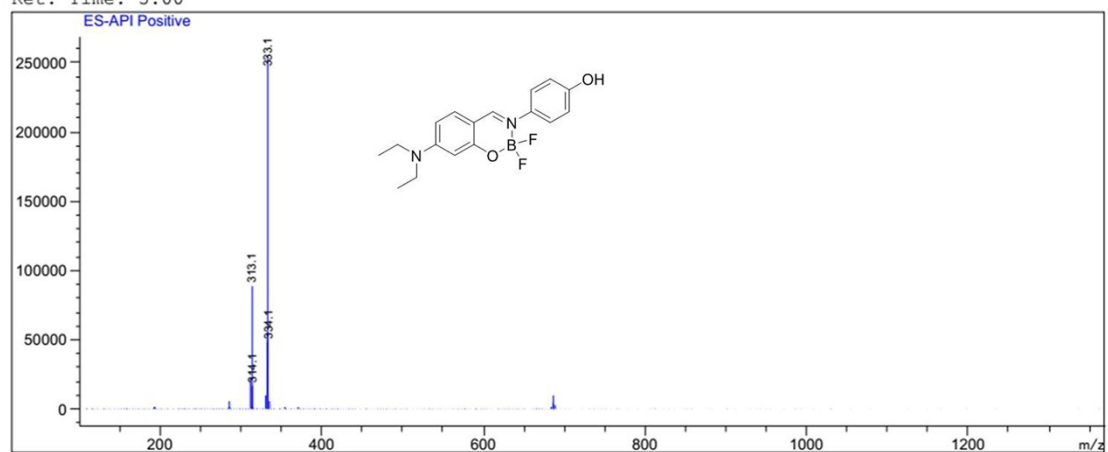

Ret. Time: 5.48

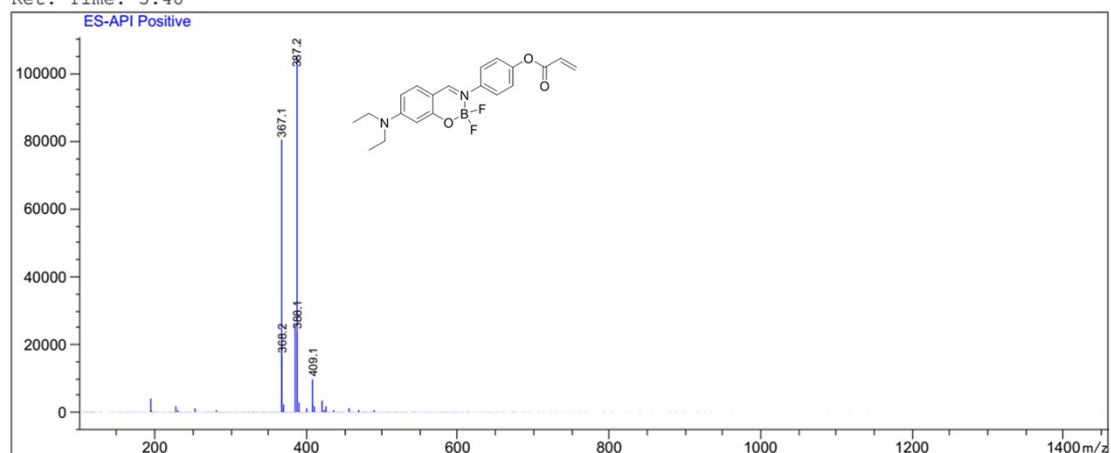

Supplement: c9ay00235a1.pdf [file c9ay00235a1.pdf]
